# Supplementary material for: An N-terminal motif in NLR immune receptors is functionally conserved across distantly related plant species
Source: eLife. 2019 Nov 27;8:e49956. doi: 10.7554/eLife.49956 (PMC6944444; doi:10.7554/eLife.49956)
Supplement: Figure 4—source data 1. — HMM scores are listed with the IDs, tomato (Solyc-) and Arabidopsis (AT-), and annotation information. [file elife-49956-fig4-data1.xlsx]

## Sheet: HMMER_ITAG3.2
ID	Description	HMM score
Solyc07g039400.2.1	Disease resistance protein (AHRD V3.3 *-*	35.5
Solyc04g009660.2.1	LOW QUALITY:Nbs-lrr resistance protein (A	35
Solyc04g009240.2.1	Nbs-lrr resistance protein (AHRD V3.3 ***	34.6
Solyc04g009120.2.1	Nbs-lrr resistance protein (AHRD V3.3 ***	34.1
Solyc04g009130.3.1	Nbs-lrr resistance protein (AHRD V3.3 ***	33.3
Solyc04g025840.2.1	Disease resistance family protein (AHRD V	33.2
Solyc04g009290.1.1	Nbs-lrr resistance protein (AHRD V3.3 ***	32.8
Solyc04g026110.3.1	Disease resistance family protein (AHRD V	32.5
Solyc04g007070.3.1	Disease resistance protein (NBS-LRR class	32.5
Solyc04g009135.1.1	R2 late blight resistance protein (AHRD V	31.7
Solyc04g025820.1.1	Disease resistance protein (AHRD V3.3 *-*	30.9
Solyc04g009150.1.1	Nbs-lrr resistance protein (AHRD V3.3 ***	30.8
Solyc07g039420.1.1	Disease resistance protein (NBS-LRR class	30.6
Solyc04g009250.1.1	Nbs-lrr resistance protein (AHRD V3.3 ***	29.9
Solyc04g009110.1.1	Nbs-lrr resistance protein (AHRD V3.3 ***	29.1
Solyc04g007060.3.1	Disease resistance protein (NBS-LRR class	28.9
Solyc04g007030.3.1	Disease resistance protein (AHRD V3.3 ***	28.3
Solyc05g009630.3.1	Disease resistance protein (AHRD V3.3 ***	25
Solyc10g047320.2.1	Disease resistance protein (CC-NBS-LRR cl	23.5
Solyc02g084890.2.1	NBS-LRR disease resistance protein NBS50	22.8
Solyc10g008220.3.1	Disease resistance protein (AHRD V3.3 ***	22
Solyc01g090430.3.1	NRC1	18.6
Solyc09g092300.3.1	Ph-3 resistance protein (AHRD V3.3 *-* A0	17.6
Solyc04g015210.3.1	Disease resistance protein (AHRD V3.3 ***	17.5
Solyc09g005290.1.1	LOW QUALITY:Nbs-lrr resistance protein, p	15.7
Solyc09g092310.1.1	Ph-3 resistance protein (AHRD V3.3 *** A0	15.6
Solyc09g090620.1.1	Disease resistance family protein (AHRD V	15.5
Solyc04g007050.3.1	Disease resistance protein (AHRD V3.3 ***	15.2
Solyc09g092290.1.1	Ph-3 resistance protein (AHRD V3.3 *** A0	15.1
Solyc02g070730.1.1	LOW QUALITY:NBS-LRR resistance protein (A	14.7
Solyc09g092280.1.1	Ph-3 resistance protein (AHRD V3.3 *** A0	14.5
Solyc04g008150.2.1	Disease resistance protein (AHRD V3.3 ***	14.4
Solyc03g005660.3.1	Disease resistance protein (AHRD V3.3 ***	14.2
Solyc03g005670.3.1	Disease resistance protein (CC-NBS-LRR cl	10.7
Solyc03g119270.1.1	AP-3 complex subunit delta (AHRD V3.3 ***	10.2
Solyc09g064610.3.1	NBS-LRR resistance protein (AHRD V3.3 ***	9.9
Solyc12g008590.2.1	Profilin (AHRD V3.3 *** A0A0V0HAW8_SOLCH)	9.5
Solyc08g063080.3.1	UDP-sulfoquinovose synthase (AHRD V3.3 **	9.3
Solyc01g086810.2.1	NBS-LRR disease resistance protein (AHRD	9.1
Solyc06g069820.3.1	DUF674 family protein (AHRD V3.3 *** A0A0	8.8
Solyc07g007970.3.1	keratin-associated protein, putative (DUF	8.8
Solyc06g066410.3.1	Profilin (AHRD V3.3 *** K4C7R7_SOLLC)	8.8
Solyc08g065250.3.1	Kinase family protein (AHRD V3.3 *** B9HD	8.7
Solyc08g076000.3.1	NBS-LRR resistance protein (AHRD V3.3 ***	8.5
Solyc04g008730.3.1	Alpha-galactosidase (AHRD V3.3 *** K4BP29	8.1
Solyc05g013500.3.1	Glycosyltransferase (AHRD V3.3 *** A0A0R0	8.1
Solyc12g044630.2.1	Profilin (AHRD V3.3 *** M1CJS2_SOLTU)	8
Solyc01g099770.3.1	meloidogyne-induced giant cell protein DB	7.8
Solyc12g014065.1.1	peroxisomal ABC transporter 1 (AHRD V3.3	7.7
Solyc01g091900.3.1	Peroxisome biogenesis 16-like protein (AH	7.7

## Sheet: HMMER_Araport11
ID	Description	HMM score
AT1G53350.1	| Disease resistance protein (CC-NBS-LRR class)	32.1
AT1G59780.2	| NB-ARC domain-containing disease resistance pr	31.3
AT1G59780.1	| NB-ARC domain-containing disease resistance pr	31.3
AT1G58807.2	| Disease resistance protein (CC-NBS-LRR class)	31
AT1G59124.1	| Disease resistance protein (CC-NBS-LRR class)	31
AT5G43470.1	| Disease resistance protein (CC-NBS-LRR class)	30.8
AT5G43470.2	| Disease resistance protein (CC-NBS-LRR class)	30.8
AT5G43470.3	| Disease resistance protein (CC-NBS-LRR class)	30.8
AT5G43470.4	| Disease resistance protein (CC-NBS-LRR class)	30.8
AT1G58807.1	| Disease resistance protein (CC-NBS-LRR class)	30.4
AT1G59124.2	| Disease resistance protein (CC-NBS-LRR class)	30.4
AT1G58848.1	| Disease resistance protein (CC-NBS-LRR class)	30
AT1G58848.2	| Disease resistance protein (CC-NBS-LRR class)	30
AT1G59218.1	| Disease resistance protein (CC-NBS-LRR class)	30
AT1G59218.2	| Disease resistance protein (CC-NBS-LRR class)	30
AT1G59218.3	| Disease resistance protein (CC-NBS-LRR class)	30
AT1G58390.1	| Disease resistance protein (CC-NBS-LRR class)	29
AT1G58390.2	| Disease resistance protein (CC-NBS-LRR class)	29
AT1G58400.1	| Disease resistance protein (CC-NBS-LRR class)	29
AT1G58400.2	| Disease resistance protein (CC-NBS-LRR class)	28.9
AT1G58400.3	| Disease resistance protein (CC-NBS-LRR class)	28.9
AT5G48620.1	| Disease resistance protein (CC-NBS-LRR class)	27.9
AT5G48620.2	| Disease resistance protein (CC-NBS-LRR class)	27.9
AT5G48620.3	| Disease resistance protein (CC-NBS-LRR class)	27.9
AT5G48620.4	| Disease resistance protein (CC-NBS-LRR class)	27.9
AT5G48620.5	| Disease resistance protein (CC-NBS-LRR class)	27.9
AT5G48620.6	| Disease resistance protein (CC-NBS-LRR class)	27.9
AT1G59620.1	| Disease resistance protein (CC-NBS-LRR class)	27.9
AT1G50180.1	| NB-ARC domain-containing disease resistance pr	27.6
AT1G58602.1	| LRR and NB-ARC domains-containing disease resi	26.6
AT1G58602.2	| LRR and NB-ARC domains-containing disease resi	26.6
AT5G35450.1	| Disease resistance protein (CC-NBS-LRR class)	24.3
AT5G35450.2	| Disease resistance protein (CC-NBS-LRR class)	24.3
AT3G46530.1	| NB-ARC domain-containing disease resistance pr	21.7
AT3G46710.1	| NB-ARC domain-containing disease resistance pr	21
AT3G46730.1	| NB-ARC domain-containing disease resistance pr	20.2
AT1G58410.3	| Disease resistance protein (CC-NBS-LRR class)	19.8
AT1G58410.1	| Disease resistance protein (CC-NBS-LRR class)	19.7
AT1G58410.2	| Disease resistance protein (CC-NBS-LRR class)	19.7
AT1G58410.4	| Disease resistance protein (CC-NBS-LRR class)	19.7
AT3G50950.1	| HOPZ-ACTIVATED RESISTANCE 1 | Chr3:18936127-18	17.7
AT3G50950.2	| HOPZ-ACTIVATED RESISTANCE 1 | Chr3:18936127-18	17.7
AT4G34930.1	| PLC-like phosphodiesterases superfamily protei	14.5
AT3G03960.1	| TCP-1/cpn60 chaperonin family protein | Chr3:1	9.4
AT3G07040.1	| NB-ARC domain-containing disease resistance pr	9.3
AT2G19770.1	| profilin 5 | Chr2:8519885-8521119 REVERSE LENG	8.7
AT4G29350.1	| profilin 2 | Chr4:14450135-14451119 FORWARD LE	8.5
AT2G19760.1	| profilin 1 | Chr2:8517074-8518067 REVERSE LENG	8.3
AT1G07200.2	| Double Clp-N motif-containing P-loop nucleosid	8.3
AT5G56600.1	| profilin | Chr5:22909882-22910710 REVERSE LENG	8.2
AT3G55740.2	| proline transporter 2 | Chr3:20696573-20698157	8.1
AT3G55740.3	| proline transporter 2 | Chr3:20696573-20698157	8.1
