# Supplementary material for: An N-terminal motif in NLR immune receptors is functionally conserved across distantly related plant species
Source: eLife. 2019 Nov 27;8:e49956. doi: 10.7554/eLife.49956 (PMC6944444; doi:10.7554/eLife.49956)
Supplement: Figure 5—source data 1. — HMM scores of the predicted MADA motifs are listed by IDs, N. benthamiana (NbS-), tomato (Solyc-), Arabidopsis (AT-), sugar beet (Bv-), rice (Os-) and barley (HORVU-), with Tribe-MCL result, the start (‘MADA_strat’) and end (‘MADA_end’) positions of the MADA motifs in the CC-NLRs. [file elife-49956-fig5-data1.xlsx]

## Sheet: Sheet1
ID	TribeMCL	HMM score	MADA_start	MADA_end
NbS00024857g0001.1	2	35.2	1	21
Solyc04g009660	2	35	1	21
Solyc04g009240	2	34.6	1	21
Solyc04g009130	2	33.4	1	21
Solyc04g009120	2	33.2	1	21
R2	2	32.8	1	21
Solyc04g009290	2	32.8	1	21
Solyc04g009260	2	32.7	1	21
Solyc04g007070	2	32.5	1	21
Solyc04g026110	2	32.5	1	21
AT1G53350.1	2	32.1	1	20
NbS00016103g0004.1	2	31.5	1	21
AT1G59780.1	2	31.3	6	26
AT1G58807.2	2	31	1	21
AT1G59124.1	2	31	1	21
AT5G43470.1	2	30.8	1	20
AT5G43470.2	2	30.8	1	20
Solyc04g009150	2	30.8	1	21
NbS00013243g0014.1	2	30.7	1	21
AT1G58807.1	2	30.4	1	21
AT1G58848.1	2	30	1	21
AT1G58848.2	2	30	1	21
AT1G59218.1	2	30	1	21
AT1G59218.2	2	30	1	21
Solyc04g009250	2	29.9	1	21
Solyc04g009110	2	29.1	1	21
AT1G58390.1	2	29	1	21
AT1G58400.1	2	29	1	21
Solyc04g007060	2	28.9	1	21
Solyc04g007030	2	28.4	1	20
Solyc04g009690	2	27.9	1	21
AT5G48620.1	2	27.9	1	20
NbS00002971g0007.1	2	27.9	1	21
AT1G59620.1	2	27.8	1	20
AT1G50180.1	2	27.6	1	20
AT1G58602.1	2	26.6	1	21
AT1G58602.2	2	26.6	1	21
NbS00004191g0008.1	2	25.9	1	21
Bv7_159070_qhcp.t1	2	24.6	68	88
NbS00018282g0019.1	2	24.4	1	21
NbS00026706g0016.1	2	24.3	1	21
AT5G35450.1	2	24.3	1	20
NbS00011087g0003.1	2	24.1	6	25
Solyc10g047320	2	23.5	1	21
Solyc02g084890	2	22.9	1	20
Bv9_203570_geqf.t1	2	22.7	1	21
Bv3_050300_iyqy.t1	2	22.3	1	20
NbS00030243g0001.1	2	22.2	1	20
Solyc10g008220	2	22	1	20
RPP13	2	21.7	1	21
NbZAR1	2	21.6	1	20
AT3G46710.1	2	21	1	21
NbS00031134g0006.1	2	21	1	20
NbS00000611g0010.1	2	20.7	3	22
Bv4_081960_kacj.t1	2	20.6	1	21
Bv3_050340_fspe.t1	2	20.4	1	21
Bv3_050340_fspe.t2	2	20.4	1	21
Bv2_034710_htkr.t1	2	20.3	1	21
AT3G46730.1	2	20.2	1	21
Os10g10360.1	22	19.9	1	21
Os10g10360.2	22	19.9	1	21
Os10g10360.3	22	19.9	1	21
AT1G58410.1	2	19.7	3	19
Bv7_157130_rfjq.t2	2	19.1	1	20
Bv7_157130_rfjq.t1	2	19.1	1	20
Solyc01g090430	2	18.6	1	21
Solyc02g070750	2	18.6	1	20
Bv5_105990_mxxc.t1	2	18.6	1	20
AT3G50950.2	2	17.7	1	20
AtZAR1	2	17.7	1	20
Solyc04g015210	2	17.4	13	32
Solyc09g018220	2	16.8	7	25
Solyc09g005290	6	15.7	1	21
Solyc09g092310	2	15.6	7	25
Solyc04g007050	2	15.3	1	20
Solyc09g092290	2	15.1	7	25
Bv3_050600_wnyc.t1	2	14.7	3	22
Solyc02g070730	2	14.7	1	21
Solyc09g092280	2	14.5	7	25
Solyc04g008150	2	14.4	13	32
Os03g30910.1	1	14.2	9	27
Solyc03g005660	2	14.2	1	20
Bv4_082220_fjik.t1	1	14	1	21
Bv2_034690_iser.t1	2	13.9	1	21
HORVU7Hr1G122430.1	2	13.4	1	21
NbS00018488g0004.1	6	13.2	1	21
Os11g46210.1	1	13	9	27
Rpi-vnt1.3	2	12.8	54	72
NbS00061479g0004.1	2	12.7	1	21
Bv4_090940_iuzt.t1	2	12.7	1	19
Os06g06400.1	1	12.3	9	27
Os10g04290.1	1	12.2	16	34
Os06g30430.1	4	12.1	1	21
Os11g39160.1	1	12	11	27
HORVU2Hr1G108000.2	2	10.9	1	19
Os11g39320.1	1	10.8	76	92
Solyc03g005670	28	10.7	3	20
Os01g05620.1	6	10.7	12	24
Os08g19694.1	2	10.7	1	20
HORVU1Hr1G092920.2	4	10.6	1	17
Pik-2	1	10.4	9	27
Os10g04180.1	1	10.3	10	27
Os08g09110.1	2	10.3	1	20
Solyc11g010160	13	9.9	1	17
Os01g36640.1	4	9.8	1	20
HORVU7Hr1G082670.9	1	9.3	1	21
RPM1	1	9.3	1	20
Solyc01g086810	1	9.2	12	32
Os08g16070.1	4	9.1	1	14
Os11g13430.1	1	9.1	16	32
Os01g70080.1	2	9	1	21
NbS00010827g0004.1	6	9	1	21
NbS00008754g0022.1	13	9	1	16
Os12g31620.1	4	8.9	1	16
Os09g09490.1	4	8.8	1	15
NbS00011331g0023.1	2	8.7	7	23
Os11g37870.1	1	8.7	4	23
Solyc08g076000	3	8.5	1	16
Os10g04674.3	4	8.5	1	14
Os10g04674.1	4	8.5	1	14
Os10g04674.2	4	8.5	1	14
HORVU1Hr1G075170.1	22	8.4	1	20
Os03g46550.1	1	8.4	6	23
Os12g32710.1	17	8.4	22	35
Os02g30150.1	17	8.3	14	32
Os11g13410.1	1	8.3	14	32
Os10g07978.1	1	8.3	1	19
Os10g07978.2	1	8.3	1	19
Os06g22460.1	4	8.1	1	21
HORVU5Hr1G085330.3	1	8.1	5	23
Os08g28600.1	1	8	8	22
MLA10	1	7.8	5	22
Os01g16400.1	1	7.6	10	28
Os10g21400.1	4	7.6	1	14
Os11g37880.1	1	7.4	4	23
Bv4_082010_odwq.t1	1	7.3	1	21
Os09g30220.1	4	7.3	1	14
HORVU3Hr1G096920.6	4	7.3	46	63
NbS00012994g0001.1	2	7.3	1	17
HORVU3Hr1G095710.3	1	7.2	1	21
Os11g12340.1	4	7.1	6	19
Os11g12340.2	4	7.1	6	19
NbS00013187g0003.1	19	7.1	1	17
Os11g12000.1	4	6.9	6	19
Os01g33810.1	4	6.9	1	13
Os08g29809.1	1	6.9	9	28
Os08g07330.2	1	6.8	4	23
Os08g31780.1	1	6.4	12	28
Os01g05600.1	6	6.4	12	24
HORVU1Hr1G004060.1	18	6.3	1006	1018
Os11g11950.1	4	6.3	2	20
Os01g23380.1	1	6.2	18	27
NbS00004802g0023.1	13	6.1	559	571
HORVU5Hr1G062610.10	1	6.1	41	59
Os09g11020.1	6	6.1	158	177
NbS00004613g0014.1	9	6.1	48	59
Os11g12330.1	4	6.1	2	20
HORVU1Hr1G012190.1	1	6	5	22
Os11g34920.1	1	6	6	24
Solyc08g075640	3	5.9	1	20
Os11g17014.1	1	5.9	1	21
NbS00031132g0007.1	9	5.7	276	290
Os08g07340.1	1	5.7	5	23
HORVU3Hr1G099740.7	1	5.7	4	23
HORVU3Hr1G001510.3	4	5.7	1	14
Os07g40810.1	1	5.6	9	28
NbS00004955g0024.1	9	5.5	269	283
Os11g37850.1	1	5.5	6	23
HORVU6Hr1G075320.1	1	5.5	45	63
Bv4_089550_fzgy.t1	100	5.4	682	693
HORVU2Hr1G022620.8	22	5.3	1	20
Os11g37780.1	1	5.2	11	23
Os11g11810.1	1	5.2	260	274
HORVU7Hr1G023750.1	1	5.2	4	23
HORVU7Hr1G023730.1	1	5.2	4	3
HORVU0Hr1G001780.1	4	5.1	1	14
NbS00000634g0116.1	7	5.1	84	96
Os08g05440.1	1	5.1	5	23
Os10g04060.1	3	5	9	23
Os11g37740.1	1	4.9	2	16
Os02g19750.1	1	4.9	514	530
Os08g07940.1	1	4.9	12	28
Os11g43420.1	1	4.8	11	28
Os11g27440.1	1	4.8	4	20
Os02g17304.1	1	4.7	12	28
HORVU2Hr1G038230.12	4	4.7	104	118
Os11g37860.1	1	4.7	7	23
HORVU2Hr1G012010.2	1	4.6	4	24
Os12g10340.1	17	4.6	17	30
HORVU1Hr1G002640.3	4	4.6	3	16
HORVU6Hr1G002150.4	1	4.6	6	25
HORVU1Hr1G005470.2	1	4.5	12	27
Os12g36690.1	1	4.4	4	20
NbS00002061g0001.1	3	4.4	14	24
Os06g06850.1	1	4.3	9	28
HORVU3Hr1G099360.6	1	4.3	36	53
Os08g07380.1	1	4.3	527	541
HORVU7Hr1G008210.5	4	4.2	1	14
Os12g33160.1	1	4.2	4	20
Os02g09790.1	4	4.1	1	13
HORVU5Hr1G123480.1	1	4.1	14	27
Os12g36720.1	1	4.1	4	20
Os12g10180.1	17	4.1	24	40
Os11g12040.1	4	4	1	20
Os12g10460.1	17	4	17	29
Solyc12g094660	92	3.8	8	22
Bv6_141050_tjei.t1	3	3.8	1	9
HORVU7Hr1G115950.11	1	3.8	70	85
HORVU7Hr1G008170.3	4	3.8	6	19
Os08g19980.1	70	3.7	NA	NA
NbS00032132g0014.1	9	3.7	NA	NA
HORVU3Hr1G013250.10	6	3.6	5	24
HORVU1Hr1G001630.1	4	3.6	1	10
Sr33	1	3.6	5	20
Solyc05g007630	9	3.6	941	951
Os07g08890.1	4	3.6	1	20
HORVU6Hr1G090470.10	1	3.6	10	26
Os12g17490.1	1	3.5	9	27
Os12g37740.1	1	3.5	NA	NA
Os01g33684.1	14	3.5	1	17
Os01g33684.2	14	3.5	1	17
Os01g33684.3	14	3.5	1	17
Solyc05g007170	24	3.5	NA	NA
HORVU5Hr1G115270.2	17	3.5	159	175
HORVU1Hr1G094320.1	1	3.4	9	28
HORVU7Hr1G023770.19	1	3.4	4	20
HORVU5Hr1G074600.1	17	3.3	12	29
Sr50	1	3.3	NA	NA
Os10g04110.1	1	3.2	NA	NA
HORVU6Hr1G084930.1	1	3.2	9	27
Os11g39730.1	1	3.2	365	379
Solyc04g008120	7	3.2	NA	NA
Os12g37760.1	1	3.1	6	24
HORVU5Hr1G068380.3	1	3.1	5	23
Solyc10g085460	3	3.1	NA	NA
NbS00040944g0001.1	28	3	3	17
HORVU2Hr1G006480.6	1	3	84	94
Os08g31800.1	1	2.9	NA	NA
Os08g05800.1	4	2.9	NA	NA
NbS00033032g0022.1	7	2.9	NA	NA
Os10g04120.1	3	2.9	NA	NA
HORVU3Hr1G013270.16	6	2.9	6	24
Solyc05g007610	9	2.9	NA	NA
Os06g17880.1	1	2.8	NA	NA
AT1G61190.1	10	2.8	703	713
HORVU5Hr1G022730.24	1	2.8	NA	NA
HORVU2Hr1G033910.1	1	2.8	NA	NA
HORVU6Hr1G084840.1	1	2.8	38	57
