# Supplementary material for: An N-terminal motif in NLR immune receptors is functionally conserved across distantly related plant species
Source: eLife. 2019 Nov 27;8:e49956. doi: 10.7554/eLife.49956 (PMC6944444; doi:10.7554/eLife.49956)
Supplement: Figure 5—source data 2. — The IDs are listed with the HMM score. [file elife-49956-fig5-data2.xlsx]

## Sheet: Sheet1
ID	Other IDs	HMM score
AT1G50180.1		27.6
AT1G53350.1	RPP8H	32.1
AT1G58390.1		29
AT1G58400.1		29
AT1G58410.1		19.7
AT1G58602.1	RPP7	26.6
AT1G58602.2	RPP7	26.6
AT1G58807.1	RPP7a/b	30.4
AT1G58807.2	RPP7a/b	31
AT1G58848.1	RPP7a/b	30
AT1G58848.2	RPP7a/b	30
AT1G59124.1	RPP7a/b	31
AT1G59218.1	RPP7a/b	30
AT1G59218.2	RPP7a/b	30
AT1G59620.1		27.8
AT1G59780.1		31.3
AT3G07040.1	RPM1	9.3
AT3G46530.1	RPP13	21.7
AT3G46710.1		21
AT3G46730.1		20.2
AT3G50950.1	ZAR1	17.7
AT3G50950.2	ZAR1	17.7
AT5G35450.1	RPP8H	24.3
AT5G43470.1	RPP8/HRT	30.8
AT5G43470.2	RPP8/HRT	30.8
AT5G48620.1	RPP8H	27.9
