# Supplementary material for: An N-terminal motif in NLR immune receptors is functionally conserved across distantly related plant species
Source: eLife. 2019 Nov 27;8:e49956. doi: 10.7554/eLife.49956 (PMC6944444; doi:10.7554/eLife.49956)
Supplement: Supplementary file 2. — This MADA-HMM was used for searching MADA-CC-NLRs from CC-NLR database (Figure 3—source data 1). [file elife-49956-supp2.hmm]

HMMER3/f [3.2.1 | June 2018]
NAME  CC_motif_1
LENG  21
ALPH  amino
RF    no
MM    no
CONS  yes
CS    no
MAP   yes
DATE  Wed Oct 16 14:48:25 2019
NSEQ  87
EFFN  87.000000
CKSUM 2770014711
STATS LOCAL MSV       -6.3864  0.73775
STATS LOCAL VITERBI   -6.4893  0.73775
STATS LOCAL FORWARD   -3.4693  0.73775
HMM          A        C        D        E        F        G        H        I        K        L        M        N        P        Q        R        S        T        V        W        Y   
            m->m     m->i     m->d     i->m     i->i     d->m     d->d
  COMPO   2.06975  5.95673  3.23899  2.38534  3.27128  3.22892  5.27113  2.79606  3.10101  1.84327  3.10881  3.17848  4.99560  3.05206  4.35132  2.84700  3.27966  2.16308  4.30130  4.16803
          2.68618  4.42225  2.77519  2.73123  3.46354  2.40513  3.72494  3.29354  2.67741  2.69355  4.24690  2.90347  2.73739  3.18146  2.89801  2.37887  2.77519  2.98518  4.58477  3.61503
          0.00047  8.05818  8.78053  0.61958  0.77255  0.00000        *
      1   3.10485  7.47640  7.96817  3.25194  6.32670  7.24197  7.66449  5.41132  6.87094  2.94462  0.26331  7.42625  7.59170  7.22940  4.08218  6.61828  6.35338  2.76445  8.13632  7.03387      1 M - - -
          2.68618  4.42225  2.77519  2.73123  3.46354  2.40513  3.72494  3.29354  2.67741  2.69355  4.24690  2.90347  2.73739  3.18146  2.89801  2.37887  2.77519  2.98518  4.58477  3.61503
          0.00047  8.05818  8.78053  0.61958  0.77255  0.48576  0.95510
      2   0.43221  7.23179  7.91179  7.47856  6.69842  4.29142  7.66126  5.90178  7.26734  2.47030  6.71217  7.15158  7.21090  7.36977  7.24359  5.98576  2.86027  1.92784  8.23561  3.31551      2 A - - -
          2.68618  4.42225  2.77519  2.73123  3.46354  2.40513  3.72494  3.29354  2.67741  2.69355  4.24690  2.90347  2.73739  3.18146  2.89801  2.37887  2.77519  2.98518  4.58477  3.61503
          0.00047  8.05818  8.78053  0.61958  0.77255  0.48576  0.95510
      3   3.12291  8.08593  0.91571  1.36457  7.42018  2.91074  6.45023  6.92159  3.67276  6.38756  7.14101  3.63530  6.62271  5.56159  5.77547  2.97081  2.14244  6.47297  8.51584  4.66354      3 d - - -
          2.68618  4.42225  2.77519  2.73123  3.46354  2.40513  3.72494  3.29354  2.67741  2.69355  4.24690  2.90347  2.73739  3.18146  2.89801  2.37887  2.77519  2.98518  4.58477  3.61503
          0.00047  8.05818  8.78053  0.61958  0.77255  0.48576  0.95510
      4   0.66638  6.86209  6.46876  2.90569  5.99039  3.20906  6.62865  3.08508  4.00408  3.81033  5.98502  6.20475  6.70920  6.08139  6.08830  1.86534  2.68776  2.76221  7.47533  6.26791      4 A - - -
          2.68618  4.42225  2.77519  2.73123  3.46354  2.40513  3.72494  3.29354  2.67741  2.69355  4.24690  2.90347  2.73739  3.18146  2.89801  2.37887  2.77519  2.98518  4.58477  3.61503
          0.00047  8.05818  8.78053  0.61958  0.77255  0.48576  0.95510
      5   1.72498  6.76719  7.38970  6.77874  2.51130  3.58365  6.93440  2.12889  6.56474  1.74531  5.89057  6.75770  3.33549  6.69596  6.57075  5.90371  3.21402  1.11960  7.42048  6.24368      5 v - - -
          2.68618  4.42225  2.77519  2.73123  3.46354  2.40513  3.72494  3.29354  2.67741  2.69355  4.24690  2.90347  2.73739  3.18146  2.89801  2.37887  2.77519  2.98518  4.58477  3.61503
          0.00047  8.05818  8.78053  0.61958  0.77255  0.48576  0.95510
      6   6.75062  7.87610  8.96010  8.55397  7.16293  8.61753  9.67000  1.70339  8.59575  1.53312  3.69116  8.79375  8.68896  8.82126  8.79922  8.14439  3.22109  0.62932  9.61615  8.45540      6 V - - -
          2.68618  4.42225  2.77519  2.73123  3.46354  2.40513  3.72494  3.29354  2.67741  2.69355  4.24690  2.90347  2.73739  3.18146  2.89801  2.37887  2.77519  2.98518  4.58477  3.61503
          0.00047  8.05818  8.78053  0.61958  0.77255  0.48576  0.95510
      7   2.99114  7.63084  3.60002  2.33192  3.35683  2.76038  6.07779  6.46382  3.28589  3.79974  6.67123  2.11195  6.28431  5.17379  3.18060  1.07217  1.92793  6.02209  8.06286  6.65120      7 s - - -
          2.68618  4.42225  2.77519  2.73123  3.46354  2.40513  3.72494  3.29354  2.67741  2.69355  4.24690  2.90347  2.73739  3.18146  2.89801  2.37887  2.77519  2.98518  4.58477  3.61503
          0.00047  8.05818  8.78053  0.61958  0.77255  0.48576  0.95510
      8   5.31689  6.70340  7.20693  6.59718  0.76507  6.47705  6.80552  5.13733  2.51395  2.50386  5.82248  3.62285  3.00118  6.54229  6.42984  2.70179  2.92453  2.29381  7.32034  2.98669      8 f - - -
          2.68618  4.42225  2.77519  2.73123  3.46354  2.40513  3.72494  3.29354  2.67741  2.69355  4.24690  2.90347  2.73739  3.18146  2.89801  2.37887  2.77519  2.98518  4.58477  3.61503
          0.00047  8.05818  8.78053  0.61958  0.77255  0.48576  0.95510
      9   1.17945  6.86621  7.49004  6.91997  3.00891  2.37536  7.07187  5.39586  6.70251  1.23386  6.08153  6.81205  4.50139  6.82413  6.69873  3.04502  4.10938  1.79039  7.58339  6.41214      9 a - - -
          2.68618  4.42225  2.77519  2.73123  3.46354  2.40513  3.72494  3.29354  2.67741  2.69355  4.24690  2.90347  2.73739  3.18146  2.89801  2.37887  2.77519  2.98518  4.58477  3.61503
          0.00047  8.05818  8.78053  0.61958  0.77255  0.48576  0.95510
     10   2.97442  7.65811  8.64697  8.20144  7.18771  3.25699  8.97111  1.55524  8.16417  1.46405  6.90731  8.32176  8.35852  8.44573  8.33211  7.56731  3.29332  0.85356  9.29280  8.03885     10 v - - -
          2.68618  4.42225  2.77519  2.73123  3.46354  2.40513  3.72494  3.29354  2.67741  2.69355  4.24690  2.90347  2.73739  3.18146  2.89801  2.37887  2.77519  2.98518  4.58477  3.61503
          0.00047  8.05818  8.78053  0.61958  0.77255  0.48576  0.95510
     11   3.40807  7.65167  2.97834  0.94523  6.99758  3.20219  6.09500  3.76047  3.05991  4.13327  6.69249  3.49483  6.30023  1.23502  5.32583  2.82719  5.36804  6.04283  8.08345  6.67058     11 e - - -
          2.68618  4.42225  2.77519  2.73123  3.46354  2.40513  3.72494  3.29354  2.67741  2.69355  4.24690  2.90347  2.73739  3.18146  2.89801  2.37887  2.77519  2.98518  4.58477  3.61503
          0.00047  8.05818  8.78053  0.61958  0.77255  0.48576  0.95510
     12   2.79008  7.80723  5.76938  5.17520  7.15173  6.20401  6.32111  2.52537  1.00723  3.34128  6.86077  1.53674  6.58334  2.93379  2.69567  2.91613  5.65704  6.20040  3.09553  6.87834     12 k - - -
          2.68618  4.42225  2.77519  2.73123  3.46354  2.40513  3.72494  3.29354  2.67741  2.69355  4.24690  2.90347  2.73739  3.18146  2.89801  2.37887  2.77519  2.98518  4.58477  3.61503
          0.00047  8.05818  8.78053  0.61958  0.77255  0.48576  0.95510
     13   2.05851  7.55232  8.33868  7.77901  6.46813  7.65473  8.09254  2.27086  7.62605  0.40548  6.28819  7.83649  7.90029  7.70408  7.64137  7.01901  3.65632  3.34871  8.39646  3.41611     13 L - - -
          2.68618  4.42225  2.77519  2.73123  3.46354  2.40513  3.72494  3.29354  2.67741  2.69355  4.24690  2.90347  2.73739  3.18146  2.89801  2.37887  2.77519  2.98518  4.58477  3.61503
          0.00047  8.05818  8.78053  0.61958  0.77255  0.48576  0.95510
     14   2.52437  6.78631  4.20820  3.78666  3.67710  1.29511  6.66413  2.92867  2.61647  2.20774  3.36147  6.31166  6.73927  2.98451  6.17301  3.00789  3.74981  3.18793  2.26987  3.31134     14 g - - -
          2.68618  4.42225  2.77519  2.73123  3.46354  2.40513  3.72494  3.29354  2.67741  2.69355  4.24690  2.90347  2.73739  3.18146  2.89801  2.37887  2.77519  2.98518  4.58477  3.61503
          0.00047  8.05818  8.78053  0.61958  0.77255  0.48576  0.95510
     15   4.00268  7.64100  1.89115  2.23182  6.98726  2.93043  3.60338  6.47448  2.51287  5.94679  6.68153  1.61202  4.23996  1.54855  5.31465  2.41261  3.50304  6.03231  8.07279  6.66043     15 q - - -
          2.68618  4.42225  2.77519  2.73123  3.46354  2.40513  3.72494  3.29354  2.67741  2.69355  4.24690  2.90347  2.73739  3.18146  2.89801  2.37887  2.77519  2.98518  4.58477  3.61503
          0.00047  8.05818  8.78053  0.61958  0.77255  0.48576  0.95510
     16   5.31599  6.68848  7.29539  6.67891  2.25221  6.48696  6.82127  2.85257  6.46019  0.71395  3.75433  6.65452  6.85046  2.94959  4.58733  3.28180  3.80843  2.34045  2.98169  3.21588     16 l - - -
          2.68618  4.42225  2.77519  2.73123  3.46354  2.40513  3.72494  3.29354  2.67741  2.69355  4.24690  2.90347  2.73739  3.18146  2.89801  2.37887  2.77519  2.98518  4.58477  3.61503
          0.00047  8.05818  8.78053  0.61958  0.77255  0.48576  0.95510
     17   2.11696  7.97776  8.88268  3.42486  6.57034  8.34324  8.81284  2.56393  8.25939  0.42866  3.21518  8.52762  8.39922  8.19600  8.24395  7.76666  7.02498  2.61504  8.81585  7.82420     17 L - - -
          2.68618  4.42225  2.77519  2.73123  3.46354  2.40513  3.72494  3.29354  2.67741  2.69355  4.24690  2.90347  2.73739  3.18146  2.89801  2.37887  2.77519  2.98518  4.58477  3.61503
          0.00047  8.05818  8.78053  0.61958  0.77255  0.48576  0.95510
     18   2.73644  7.23088  5.67671  2.52883  3.99255  3.74215  6.25695  1.57942  3.21437  2.30532  6.31293  4.13326  6.42947  3.63571  2.93510  1.96222  2.85989  1.81731  7.76089  6.45848     18 i - - -
          2.68618  4.42225  2.77519  2.73123  3.46354  2.40513  3.72494  3.29354  2.67741  2.69355  4.24690  2.90347  2.73739  3.18146  2.89801  2.37887  2.77519  2.98518  4.58477  3.61503
          0.00047  8.05818  8.78053  0.61958  0.77255  0.48576  0.95510
     19   4.02352  7.63114  1.81628  1.31821  6.97763  5.89039  3.25156  6.46459  2.83689  5.93702  6.67143  3.40077  6.28391  1.44041  2.94192  3.22003  3.97279  6.02254  3.59333  3.46150     19 e - - -
          2.68618  4.42225  2.77519  2.73123  3.46354  2.40513  3.72494  3.29354  2.67741  2.69355  4.24690  2.90347  2.73739  3.18146  2.89801  2.37887  2.77519  2.98518  4.58477  3.61503
          0.00047  8.05818  8.78053  0.61958  0.77255  0.48576  0.95510
     20   3.80228  8.47381  5.69184  0.57983  7.86145  6.49031  3.79127  7.32161  2.21599  3.76512  7.54016  1.63453  6.97196  2.98603  5.73090  5.89564  6.20177  6.89504  8.81833  7.44884     20 E - - -
          2.68618  4.42225  2.77519  2.73123  3.46354  2.40513  3.72494  3.29354  2.67741  2.69355  4.24690  2.90347  2.73739  3.18146  2.89801  2.37887  2.77519  2.98518  4.58477  3.61503
          0.00047  8.05818  8.78053  0.61958  0.77255  0.48576  0.95510
     21   1.36285  3.19883  7.29338  4.06342  5.77975  2.32980  6.82039  2.30483  6.45856  2.99295  3.79189  6.65324  4.26804  6.58701  6.46159  2.61633  3.72351  1.78350  2.94337  2.60828     21 a - - -
          2.68618  4.42225  2.77519  2.73123  3.46354  2.40513  3.72494  3.29354  2.67741  2.69355  4.24690  2.90347  2.73739  3.18146  2.89801  2.37887  2.77519  2.98518  4.58477  3.61503
          0.00032  8.05803        *  0.61958  0.77255  0.00000        *
//
